# Supplementary material for: Intraflagellar transport-A complex mediates ciliary entry and retrograde trafficking of ciliary G protein–coupled receptors
Source: PubMed Central journal article supplement — Mol Biol Cell. 2017 Feb 1;28(3):429–39. doi: 10.1091/mbc.E16-11-0813 (PMC5341726; doi:10.1091/mbc.e16-11-0813), 2017-02-01
Supplement: supp_E16-11-0813v1_CombinedSupMats.pdf [file supp_E16-11-0813v1_CombinedSupMats.pdf]

# Supplemental Materials

*Molecular Biology of the Cell*

Hirano et al.

**Supporting information**

**Intraflagellar transport-A complex mediates ciliary entry as well as retrograde trafficking of ciliary G protein-coupled receptors**

**Tomoaki Hirano, Yohei Katoh, and Kazuhisa Nakayama**

Graduate School of Pharmaceutical Sciences, Kyoto University, Sakyo-ku, Kyoto 606-8501, Japan

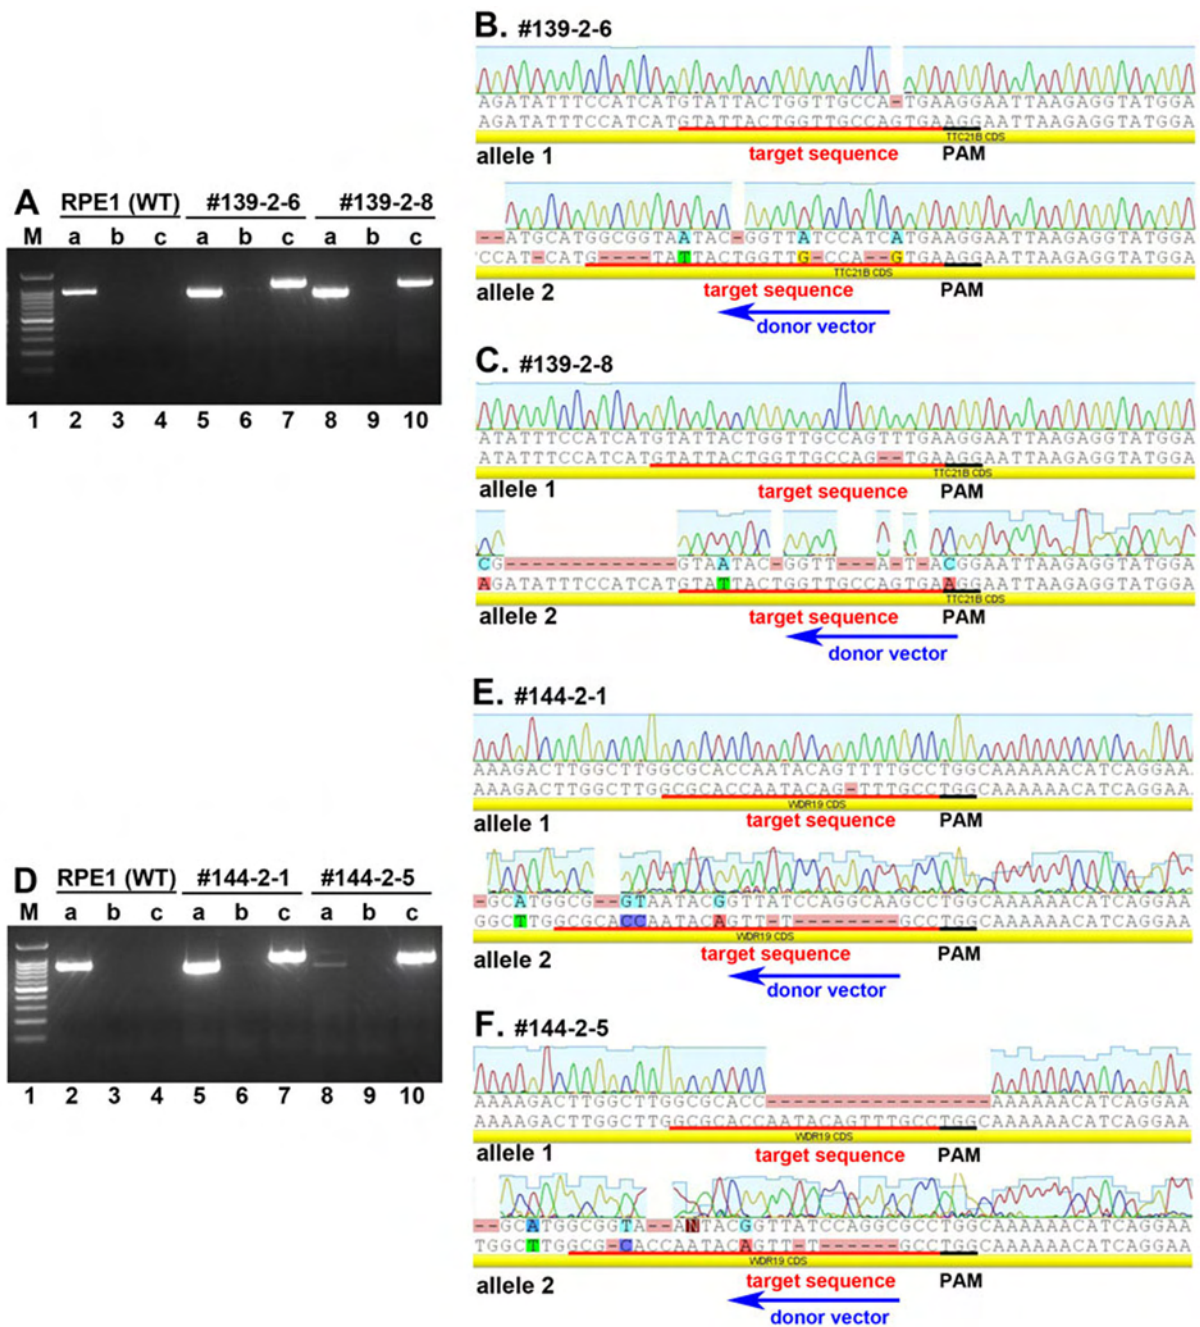

**Fig. S1. Genomic PCR and sequencing to confirm donor vector integration or small deletions or insertions in the selected *IFT139*-KO and *IFT144*-KO cell lines**

(A) Genomic DNA was extracted from control hTERT-RPE1 cells (lanes 2–4), and from *IFT139*-KO cell lines (#139-2-6, lanes 5–7; and #139-2-8, lanes 8–10) established using a donor knock-in vector containing a target sequence (see Table S2), which targets the coding region within exon 2 of the human *IFT139* gene. The DNA was subjected to PCR using primer pair a (primers 1 + 2; lanes 2, 5, and 8), pair b (primers 1 + 3; lanes 3, 6, and 9), or pair c (primers 2 + 3; lanes 4, 7, and 10) (see Table S2) to detect alleles with a small insertion, deletion, or no repair, with donor vector forward integration, or reverse integration, respectively.

Lane 1, a 100-bp ladder marker in which the most intense band is 500 bp. (B) and (C), alignments of allele sequences of cell lines #139-2-6 and #139-2-8 determined by direct sequencing of the genomic PCR products with the reference sequence encompassing the coding sequence of exon 2. Red and black lines indicate the target sequences and PAM sequence, respectively. Blue arrows indicate the direction of vector integration. (D) Genomic DNA was extracted from control hTERT-RPE1 cells (lanes 2–4), and from *IFT144*-KO cell lines (#144-2-1, lanes 5–7; and #144-2-5, lanes 8–10) established using a donor knock-in vector containing a target sequence (see Table S2), which targets the coding region within exon 2 of the human *IFT144* gene. The DNA was subjected to PCR in a similar manner to that described in (A). (E) and (F), alignments of allele sequences of cell lines #144-2-1 and #144-2-5 determined by direct sequencing of the genomic PCR products with the reference sequence encompassing the coding sequence of exon 2.

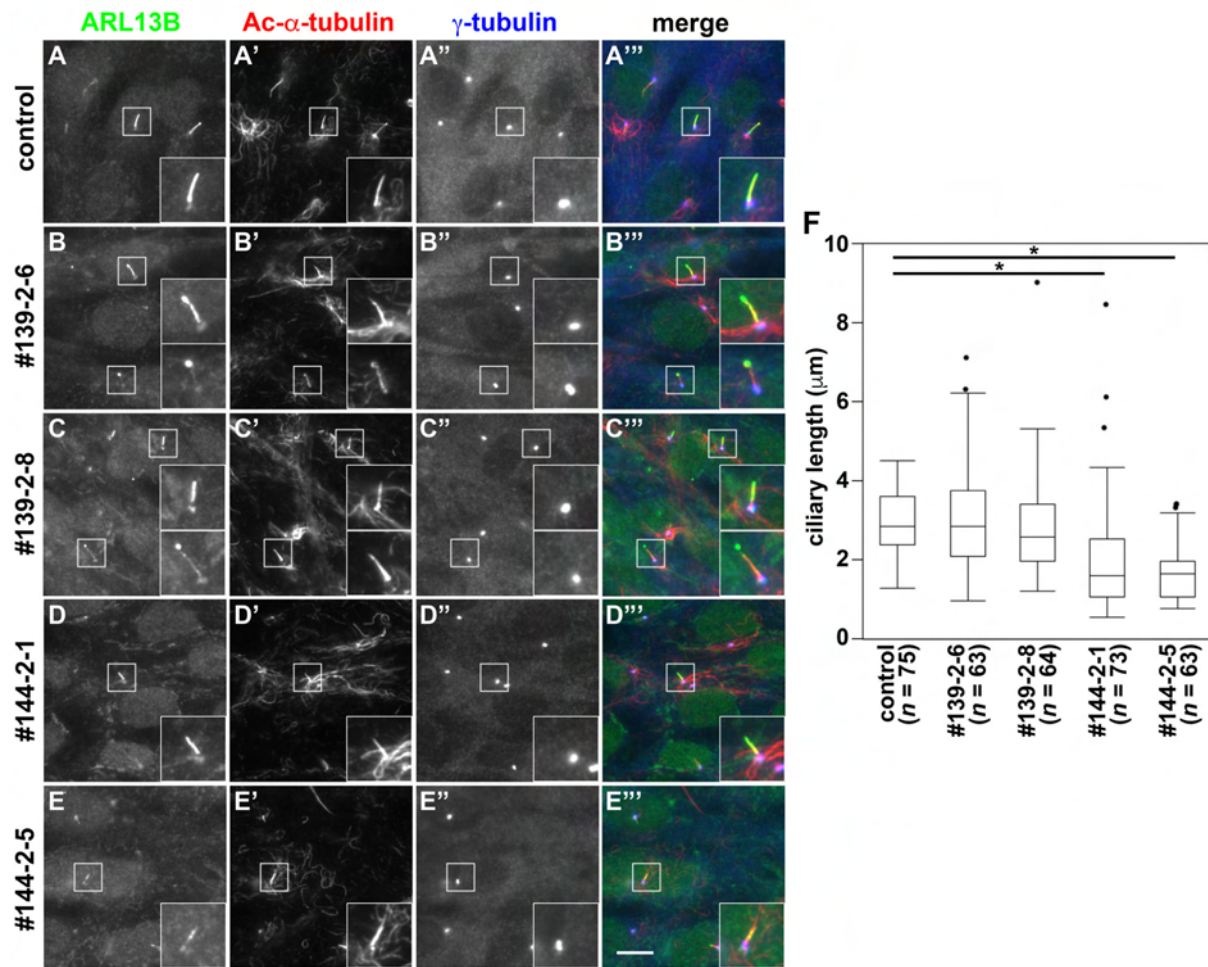

**Fig. S2. Localization of ARL13B in *IFT139*-KO and *IFT144*-KO cells**

Control RPE1 cells (A), the *IFT139*-KO cell lines #139-2-6 (B) or #139-2-8 (C), or the *IFT144*-KO cell lines #144-2-1 (D) or #144-2-5 (E) were serum-starved for 24 h and triple immunostained for ARL13B (A–E), Ac- $\alpha$ -tubulin (A'–E'), and  $\gamma$ -tubulin (A''–E''). Merged images are shown in A'''–E'''. Insets indicate enlarged images of the boxed regions. Scale bar, 10  $\mu$ m. (F) Ciliary lengths (lengths of Ac- $\alpha$ -tubulin staining) of individual control cells, and *IFT139*-KO and *IFT144*-KO cells were measured and expressed as box and whisker plots with the median values. \*,  $p < 0.0001$  (Student *t*-test).

**Table S1: Sources of cDNAs used in this study**

| cDNA   | Alternative names | Ref. sequences | CDS<br>(bp) | Protein<br>(a.a.) | Species | Sources                                                                   |
|--------|-------------------|----------------|-------------|-------------------|---------|---------------------------------------------------------------------------|
| IFT43  |                   | NM_001102564   | 627         | 208               | human   | Cloned from a cDNA library by PCR                                         |
| IFT121 | WDR35/IFTA-1      | NM_001006657   | 3546        | 1181              | human   | Kazusa DNA Res. Inst. Clone ID:<br>pF1KA1336                              |
| IFT122 | WDR10/DAF-10      | NM_018262      | 3549        | 1182              | human   | Obtained by modification of NM_052990<br>(Riken BRC clone ID: IRAL009C12) |
| IFT139 | THM1/TTC21B       | NM_024753      | 3951        | 1316              | human   | Cloned from a cDNA library by PCR                                         |
| IFT140 | CHE-11            | NM_014714      | 4389        | 1462              | human   | Riken BRC clone ID: IRAK069L05                                            |
| IFT144 | WDR19/DYF-2       | NM_025132      | 4029        | 1342              | human   | DNAFORM clone ID: 100068972                                               |
| TULP3  |                   | NM_003324      | 1329        | 442               | human   | Riken BRC clone ID: IRAK069G14                                            |

**Table S2: Plasmids used in this study**

| Vectors                | Inserts      |
|------------------------|--------------|
| pEGFP-C1               | IFT43        |
| pCAG2-EGFP-C           | IFT121       |
| pCAG2-EGFP-C           | IFT122       |
| pCAG2-EGFP-C           | IFT139       |
| pCAG2-EGFP-C           | IFT140       |
| pCAG2-EGFP-C           | IFT144       |
| pEGFP-C1               | TULP3        |
| pmCherry-C1            | IFT43        |
| pCAG2-mCherry-C        | IFT121       |
| pCAG2-mCherry-C        | IFT122       |
| pCAG2-mCherry-C        | IFT139       |
| pCAG2-mCherry-C        | IFT140       |
| pCAG2-mCherry-C        | IFT144       |
| pmCherry-C1            | TULP3        |
| pCAG2-HA-C             | IFT122       |
| pRRL.sinPPT-EGFP-C     | IFT43        |
| pRRL.sinPPT-EGFP-C     | TULP3        |
| pRRL.sinPPT-TagRFP-T-C | IFT139       |
| pRRL.sinPPT-TagRFP-T-C | IFT144       |
| pRRL.sinPPT-EGFP-N     | SSTR3        |
| pRRL.sinPPT-EGFP-N     | MCHR1        |
| pGEX-6P1               | GFP-nanobody |

**Table S3: Oligo DNAs used in this study**

| Names                       | Sequences                       |
|-----------------------------|---------------------------------|
| pTagBFP-N-RV (primer 3)     | 5'-GTTGTCCACGGTGCCCTCCATGTAC-3' |
| IFT139-genome-FW (primer 1) | 5'-GGTCTGGCAATGGAAGCCTCTTG-3'   |
| IFT139-genome-RV (primer 2) | 5'-TACTAATGAAACCTCTGCCAGAGG-3'  |
| IFT139-gRNA#2-S             | 5'-CACCGTATTACTGGTTGCCAGTGA-3'  |
| IFT139-gRNA#2-AS            | 5'-AAACTCACTGGCAACCAGTAATAC-3'  |
| IFT139-gRNA#2-donor-AS      | 5'-TCCATCACTGGCAACCAGTAATAC-3'  |
| IFT144-genome-FW (primer 1) | 5'-TCCGTGCCACAGATAATTAAGTG-3'   |
| IFT144-genome-RV (primer 2) | 5'-CACTGCACCTGGCCTAAATGTTTC-3'  |
| IFT144-gRNA#2-S             | 5'-CACCGCGCACCAATACAGTTTGCC-3'  |
| IFT144-gRNA#2-AS            | 5'-AAACGGCAAACCTGTATTGGTGCGC-3' |
| IFT144-gRNA#2-donor-AS      | 5'-TCCAGGCAAACCTGTATTGGTGCGC-3' |



**Table S4: Antibodies used in this study**

| Antibodies                                  | Manufacturers          | Clone or catalog numbers | Dilution (purpose)            |
|---------------------------------------------|------------------------|--------------------------|-------------------------------|
| Monoclonal mouse anti-Ac- $\alpha$ -tubulin | Sigma-Aldrich          | 6-11B-1                  | 1:500 (immunofluorescence)    |
| Monoclonal mouse anti- $\gamma$ -tubulin    | Sigma-Aldrich          | GTU88                    | 1:1,000 (immunofluorescence)  |
| Polyclonal rabbit anti-IFT139               | Sigma-Aldrich          | HPA035495                | 1:1,000 (immunoblotting)      |
| Polyclonal rabbit anti-ARL13B               | Proteintech            | 17711-1-AP               | 1:1,000 (immunofluorescence)  |
| Polyclonal rabbit anti-IFT88                | Proteintech            | 13967-1-AP               | 1:200 (immunofluorescence)    |
| Polyclonal rabbit anti-IFT140               | Proteintech            | 17460-1-AP               | 1:100 (immunofluorescence)    |
| Polyclonal rabbit anti-GPR161               | Proteintech            | 13398-1-AP               | 1:200 (immunofluorescence)    |
| Polyclonal rabbit anti-SMO                  | Abcam                  | ab38686                  | 1:100 (immunofluorescence)    |
| Monoclonal mouse anti-FOP                   | Abnova                 | 2B1                      | 1:10,000 (immunofluorescence) |
| Monoclonal mouse anti-GFP                   | BD Biosciences         | JL-8                     | 1:1,000 (immunoblotting)      |
| Polyclonal rabbit anti-RFP                  | MBL Life Science       | PM005                    | 1:1,000 (immunoblotting)      |
| Monoclonal rat anti-HA                      | Roche Applied Science  | 3F10                     | 1:1,000 (immunoblotting)      |
| AlexaFluor-conjugated secondary             | Molecular Probes       | A21240, A11034, A21127   | 1:1,000 (immunofluorescence)  |
| DyLight 649-conjugated secondary            | Jackson ImmunoResearch | 115-495-209              | 1:1,000 (immunofluorescence)  |
| Peroxidase-conjugated secondary             | Jackson ImmunoResearch | 115-035-166, 111-035-144 | 1:3,000 (immunoblotting)      |
